1 Systematic review reveals multiple sexually antagonistic  
2 polymorphisms affecting human disease and complex  
3 traits

4  
5 Jon Alexander Harper<sup>1\*</sup>, Tim Janicke<sup>2,3</sup> and Edward H. Morrow<sup>4</sup>

6 \* Corresponding author

7 <sup>1</sup>Evolution, Behaviour and Environment Group, School of Life Sciences, John Maynard Smith  
8 Building, University of Sussex, Brighton, BN1 9QG, UK.

9 <sup>2</sup>Centre d'Écologie Fonctionnelle et Évolutive, UMR 5175, CNRS, Université de Montpellier,  
10 École Pratique des Hautes Études, Montpellier, France.

11 <sup>3</sup>Applied Zoology, Technical University Dresden, Zellescher Weg 20b, 01062 Dresden,  
12 Germany.

13 <sup>4</sup>Department of Environmental and Life Sciences, Karlstad University, 651 88, Karlstad,  
14 Sweden.

15  
16 Jon Alexander Harper ORCID: [0000-0002-1765-9990](https://orcid.org/0000-0002-1765-9990)

17 Tim Janicke ORCID: [0000-0002-1453-6813](https://orcid.org/0000-0002-1453-6813)

18 Edward H Morrow ORCID: [0000-0002-1853-7469](https://orcid.org/0000-0002-1853-7469)

19

20

21 Short title: Systematic review of sexually antagonistic genes in human disease

22

## 23 Abstract

24 Sex differences in human disease risk and incidence are widely documented but their origins  
25 are poorly understood. An evolutionary model for differential disease risk between the sexes  
26 posits that alleles that are a risk factor (deleterious) in one sex may actually be protective  
27 (beneficial) in the opposite sex, and as such these sexually antagonistic (SA) alleles may be  
28 maintained in the population at frequencies higher than expected under purifying selection  
29 against unconditionally deleterious alleles. Sexual antagonism at genetic loci is thought to  
30 arise due to fundamental differences in how Darwinian fitness is maximized in the two sexes.  
31 Evidence for the occurrence of SA alleles comes from a number of non-human vertebrate and  
32 invertebrate models, which indicate they are common, although only very few specific SA loci  
33 have been identified. While there are many examples of loci with sex-limited effects in  
34 humans, there are no known examples of specific genetic variants that experience opposing  
35 patterns of selection between the sexes in humans. We hypothesized that this may be due to  
36 a mismatch in terminology between scientific disciplines rather than a genuine lack of  
37 examples. We therefore undertook a two-stage review of the literature for evidence of  
38 genetic polymorphisms in human disease and complex traits that exert their effects in a SA  
39 pattern, extracting effect sizes and allele frequencies where possible. In the first stage, we  
40 used search terms from evolutionary biology that aimed to identify examples of genes  
41 specifically referred to as having SA effects or were implicated in intralocus sexual conflict. In  
42 the second, we used terminology that was designed to capture as many examples as possible  
43 from the biomedical literature (e.g. sex-dependent, sex-opposite, men/women, boys/girls),  
44 which may have been missed in the first stage due to differences in terminology between the  
45 disciplines. The two searches gave very different results. The first stage returned 34 papers in  
46 total, none of which included evidence from humans of genetic loci with opposite effects on  
47 the two sexes. The second stage returned 881 papers, which after screening resulted in 70  
48 papers, 32 were deemed eligible, and described 51 different genetic loci or haplotypes with  
49 sex-opposite effects on complex traits or disease. Of these, 22 loci increase disease risk or  
50 severity in one sex but are protective in the other. These loci may therefore be considered SA  
51 loci if the effects on disease risk translate into marginal effects on fitness through fecundity  
52 selection or mortality, although in no case were they referred to in terms of sexual

53 antagonism. As predicted, alleles with net positive effects across the sexes occurred at a  
54 higher frequency than those with net negative effects. Our review reveals that significant  
55 long-term barriers to communication are occurring between scientific fields as a result of  
56 discipline-specific terminology. Less specific search terms revealed evidence that SA variants  
57 are maintained at relatively high frequencies in humans, apparently because while they  
58 contribute to the propensity for one sex to develop a range of diseases and disorders, they  
59 protect the other.

60 495 words

61

## 62 Introduction

63 In species with separate sexes an evolutionary conflict at the level of individual genetic loci  
64 can occur, where alleles that are favoured by selection in one sex are selected against in the  
65 other (i.e intralocus sexual conflict, Parker, 1979). This sexually antagonistic (SA) form of  
66 selection is thought to be driven by differences in how the two sexes maximize their fitness  
67 and concomitant unequal variances in reproductive success. Research into SA selection has  
68 expanded recently with the recognition that it feeds into several important evolutionary  
69 processes. It is primarily thought to drive the evolution of sexual dimorphism and trait  
70 diversification (Lande, 1980; Pennell et al., 2016; Rice, 1984), including sex-biased gene  
71 expression (Ellegren and Parsch, 2007). As a potential driver of balancing selection, it has also  
72 been implicated in the maintenance of genetic variation (Connallon and Clark, 2013; Grieshop  
73 and Arnqvist, 2018) that would otherwise be eroded by directional selection. Most recently,  
74 it has been suggested that genetic variation at SA loci could contribute to the occurrence of a  
75 number of common human diseases (Morrow, 2015; Morrow and Connallon, 2013), which  
76 also show considerable variation between the sexes in terms of their prevalence, severity and  
77 age of onset (Ober et al., 2008; Rigby and Kulathinal, 2015).

78 Despite the interest in sexual antagonism as an evolutionary force, determining the  
79 identity of SA loci remains a major challenge (Ruzicka et al., 2020). An early empirical  
80 milestone in the field of sexual conflict was achieved by quantitative genetic studies  
81 demonstrating that genomes in a laboratory adapted population of *Drosophila melanogaster*  
82 harbour significant amounts of SA standing genetic variation (Chippindale et al., 2001; Rice,  
83 1992). A number of other systems have shown similar results, albeit using different methods,  
84 including invertebrates and vertebrates from both lab and wild populations (Bonduriansky  
85 and Chenoweth, 2009; Foerster et al., 2007; Mills et al., 2011). With the advent of advanced  
86 genomic tools, two model systems report specific examples of SA genetic loci: in Atlantic  
87 salmon (*Salmo salar*) the VGLL3 locus (Barson et al., 2015), and in *D. melanogaster* the DDT-  
88 R locus (Rostant et al., 2015), the Ala-278-Thr polymorphism in the mitochondrial genome  
89 (Camus et al., 2015), and multiple candidate loci from a recent genome-wide association  
90 study (Ruzicka et al., 2019).

91 Although humans have also been shown to experience SA selection for some  
92 quantitative traits (Garver-Apgar et al., 2011; Stearns et al., 2012; Stulp et al., 2012), and there

93 are numerous reports of genetic loci with sex-specific effects (i.e. effects that differ in  
94 magnitude between the sexes) on multiple complex traits or disease phenotypes (Gilks et al.,  
95 2014; Winkler et al., 2015), there are apparently no clear examples of SA loci in humans, which  
96 is inconsistent with theoretical expectations (Connallon and Clark, 2014). One potential  
97 explanation is that sexual antagonism is a weak selective force in humans, with sexual  
98 dimorphism being rather limited (Dixson, 2009; Short, 1979). This may indicate that  
99 concordant selection pressures between the sexes have dominated our evolutionary history.  
100 But the recent quantitative genetic studies challenge this view (Stearns et al., 2012; Stulp et  
101 al., 2012), and indeed theory predicts there is an inevitability to SA loci occurring in organisms  
102 with separate sexes (Connallon and Clark, 2014; Parker et al., 1972). Thus, there is a clear  
103 disparity between, on the one hand, theoretical expectations and quantitative genetic  
104 evidence that SA selection does occur in humans, and on the other hand, a complete lack of  
105 specific examples of SA loci. All this in the context of decades of research into how individual  
106 genetic variants influence disease profiles.

107 An alternative explanation for the absence of documented SA loci in humans is that  
108 since biomedical science does not use the same terminology for SA effects that evolutionary  
109 biology uses, there may in fact be examples that have been misclassified and therefore remain  
110 hidden in the literature. For example, genetic loci with sex-specific effects are frequently  
111 referred to as *sex-dependent* effects in the biomedical literature. Other terms are also used  
112 for related concepts, including *sex-different* effects. Furthermore, *sex-opposite* effects (i.e. a  
113 positive effect in one sex and a negative in the other) could be SA effects if the phenotype in  
114 question is deleterious, as disease phenotypes often are, since they can influence an  
115 individual's survival or reproductive fitness. The biomedical literature also frequently uses the  
116 terms *sex* and *gender* interchangeably, with *males* and *females* more often than not referred  
117 to as *men and women*, or *boys and girls* (Khramtsova et al., 2019). There is therefore ample  
118 scope for discipline-specific terms to be used for describing the same concept, which may  
119 hinder communication between disciplines and obscure examples of SA loci. Moreover,  
120 although there has been some progress in introducing concepts from evolutionary biology  
121 into the field of medicine (Nesse and Williams, 1994), those inroads have been relatively  
122 recent. It is therefore likely that the concepts of (intralocus) sexual conflict and sexual  
123 antagonism are not generally well known within biomedical science, and variants that may  
124 have SA effects on disease risk may not be referred to as such. A secondary related hypothesis

125 is that SA effects, when discovered, are discounted as errors as they do not match  
126 expectations that sex-differences in phenotype or genetic architecture are not important  
127 (Clayton and Collins, 2014). As a result, that may also lead them to be misclassified or simply  
128 go unreported, leading to a general publication bias.

129 For these reasons, we propose that a systematic review of the biomedical literature  
130 to identify SA loci in humans requires a specific and targeted set of search terms that would  
131 not normally be used within the field of evolutionary biology. We test this assumption by  
132 dividing our systematic review into two stages. In the first stage, we search for papers  
133 identifying specific genetic loci using terms directly relating to the concept of sexual  
134 antagonism and others utilized in evolutionary biology. We supplement this search with a  
135 second stage, where we develop a set of terms that we hypothesize may capture the same  
136 concept as sexual antagonism within the biomedical literature, although not explicitly stated  
137 as such, as well as additional terminology relating to possible alternatives for describing the  
138 two sexes. From our searches we also extracted data on sex-specific effect sizes and allele  
139 frequencies. We were then able to explore how effect sizes varied for the same alleles  
140 between the sexes, and test the prediction that SA alleles experiencing net positive selection  
141 between the sexes may achieve higher equilibrium frequencies than alleles that experience  
142 more symmetric or net negative patterns of selection (Morrow and Connallon, 2013). Our  
143 systematic review aims to advance our understanding of SA genes in humans, which show  
144 considerable and largely unexplained diversity in sexual dimorphism for disease phenotypes  
145 (Ober et al., 2006; Rigby and Kulathinal, 2015), but we also highlight how and why  
146 interdisciplinary research (in this case between biology and medicine) can sometimes fail,  
147 impeding scientific advances over significant periods of time.

## 148 Methods

149 For this systematic review we followed PRISMA guidance where possible (Moher et al., 2009).  
150 PubMed (<https://pubmed.ncbi.nlm.nih.gov/>) was searched for articles on 2<sup>nd</sup> December 2020  
151 with no time limit. The searches were carried out in two Stages, with the organism filter set  
152 to human in both stages. In Stage 1, eligible studies were required to report specific genetic  
153 variants or haplotypes that were referred to as sexually antagonistic or were an example of  
154 intralocus sexual conflict. To achieve this, we conducted a Boolean search for articles that  
155 used the terms “sexual antagonism” OR “sexually antagonistic” OR “intralocus sexual conflict”

156 AND “locus” OR “loci”, “gene” OR “snp” OR “polymorphism” OR “variant” OR “allele” in their  
157 abstract or title. The Stage 1 search returned 34 articles in total (full search term in the  
158 supplementary material; search output is accessible at  
159 <https://pubmed.ncbi.nlm.nih.gov/collections/60255050/?sort=pubdate>).

160 In Stage 2, studies were required to report specific genetic variants or haplotypes in  
161 humans with opposite effects in the two sexes on either complex traits, the outcome of a  
162 medical intervention, or disease risk/severity. We define complex traits as likely with a  
163 polygenic genetic architecture but are not directly related to a disease phenotype. In this  
164 second stage search terms were specifically designed to include papers from the biomedical  
165 literature that may have been missed in the first stage because they do not report their  
166 findings with terms normally found within the evolutionary biology literature. Again, we  
167 conducted a Boolean search for articles that used terms in their title or abstract to describe  
168 an opposite or different effect in the two sexes (“sex dependent”, “sex different”, “gender-  
169 dependent”, “sex AND opposite”, or “gender AND opposite”), or that capture this concept  
170 with alternative words for sex (“male AND female AND opposite” OR “men AND women AND  
171 opposite” OR “boys AND girls AND opposite”) AND (“locus” OR “loci” OR “gene” OR “snp” OR  
172 “polymorphism” OR “variant” OR “allele”). Full details of the search terms used and the  
173 numbers of articles returned are provided in the supplementary material. The Stage 2 search  
174 returned 881 papers (Figure 1) (full search term in the supplementary material; search output  
175 is accessible at <https://pubmed.ncbi.nlm.nih.gov/collections/60254985/?sort=pubdate>).

176 The abstracts of the papers from Stage 1 were then examined by EM and from Stage  
177 2 by JH, and any papers that had the possibility of reporting an opposite effect of a specific  
178 genetic locus on a complex trait, medical intervention or on disease risk/severity were  
179 considered for further screening. From Stage 1, no articles passed the screening. From Stage  
180 2, this screening produced a shortlist of 70 candidate papers  
181 (<https://pubmed.ncbi.nlm.nih.gov/collections/57906298/?sort=pubdate>) Both JH and EM  
182 then reviewed all the full texts of these candidate papers in detail. Papers were included in  
183 the final list if they described a sex-opposite or SA effect linked to a specific genetic locus or  
184 loci, and reported the effect to be statistically significant (at a P-value cut-off of <0.05). One  
185 additional paper was considered from an outside source.

186 We converted all reported sex-specific effects into a standard effect size (Cohen’s *d*)  
187 quantifying the magnitude of how a given variant affects the studied trait expressed in the

188 given sex. Specifically, Cohen's  $d$  was computed based on the reported descriptive statistics  
189 ( $N$ , mean, standard error) or by conversion from other effect sizes (Odds ratio) and test  
190 statistics ( $F$ -values,  $t$ -values) using formulas reported elsewhere (Borenstein, 2009; Gurevitch  
191 et al., 2013, pp. 195–206; Lajeunesse, 2013). We sought information directly from the authors  
192 where these metrics were not possible to extract from the papers themselves (12 authors  
193 contacted, 5 responded, 3 responded with data, all later excluded as they did not fulfil the  
194 criteria for eligibility). We also recorded the gene name, locus (with accession/rs number  
195 where possible), trait affected and the frequency of the focal allele having the effect,  
196 hereafter referred to as *effect allele frequency*. Identification for the variants were taken from  
197 the studies where possible, but others necessitated searching the National Centre for  
198 Biotechnology Information (NCBI) to find the Reference SNP cluster ID for the variants  
199 described. Where effect allele frequencies were not reported, we used genotype frequencies  
200 to calculate effect allele frequency. Not all studies reported allele or genotype frequencies  
201 and so we attempted to supplement these data with allele frequencies from the 1000  
202 genomes database (Auton et al., 2015), since these show a strong correlation with effect allele  
203 frequencies reported in the studies reviewed (Pearson correlation:  $N = 25$   $r = 0.94$ ,  $P > 0.001$ ;  
204 Figure S1). However, using this approach we were only able to supplement our allele  
205 frequency data for one additional locus (rs7341475 in the *RELN* gene; Table 1).

206 If  $b_f$  and  $b_m$  represent the estimated effect of the focal allele in females and males  
207 respectively, then positive values of  $b_f$  or  $b_m$  imply that the allele is positively associated with  
208 disease expression, whereas negative values imply that the allele is negatively associated with  
209 disease expression. SA alleles are therefore defined as those with opposite effects between  
210 the sexes (i.e.  $b_f < 0 < b_m$  or  $b_m < 0 < b_f$ ). An evolutionary model of evolution at SA loci predicts  
211 that as the magnitude of the positive effect that an SA allele has outweighs the negative  
212 effect, the higher the frequency that allele can achieve (Morrow and Connallon, 2013). We  
213 therefore expect a negative relationship between the ratio of positive to negative effect sizes  
214 (hereafter referred to as the *effect size ratio*) and observed allele frequency. To investigate  
215 this, we calculated the effect size ratio by dividing the positive standardized effect size by the  
216 negative standardized effect size; when  $b_f < 0 < b_m$  effect size ratio was calculated as  $b_m / b_f$ ,  
217 and when  $b_m < 0 < b_f$  effect size ratio was calculated as  $b_f / b_m$ . Thus, SA alleles with a greater  
218 beneficial effect will have a smaller, more negative effect size ratio ( $< -1$ ), while SA alleles that  
219 have a greater deleterious effect will have a larger effect size ratio ( $> -1$ ), up to a maximum



220 value of 0 (positive values occur when the effect is positive or negative in both sexes, but the  
221 allele would then no longer be defined as a SA allele).

222 We modelled how effect allele frequency changes with effect size ratio using a  
223 generalized linear model (GLM), weighted by the inverse of the variance of the effect sizes  
224 such that data points with smaller variance have a higher weight, since smaller sample sizes  
225 were associated with larger and more variable effect sizes (Figure S2). We initially also  
226 included trait class and its interaction with effect size ratio as a fixed factor with two levels  
227 (complex trait and disease trait/severity), since alleles that influence complex traits in  
228 opposite directions are not necessarily under SA selection and so may not behave in the way  
229 predicted, whereas alleles influencing disease traits, unless very late acting, are more likely  
230 to show a closer relationship with marginal effects on fitness. As a response variable, effect  
231 allele frequency is limited between 0 and 1, so we looked at allele counts to allow allele  
232 frequency to vary freely. GLMs with binomial error distribution showed substantial  
233 overdispersion, so we used a quasibinomial function to address this issue (Payne et al., 2018).  
234 We used a Chi-squared test to infer significance of the two predictor variables and their  
235 interaction. The full model indicated that the interaction term and trait class have no  
236 significant effect, so that we report the fit of the reduced model which only includes effect  
237 size ratio. We also subsequently modelled the data for the two trait classes (complex traits  
238 and disease risk/severity) separately, again using a quasibinomial distribution function, to see  
239 if the result was replicated in these smaller subsets of the data. The raw data and R script is  
240 available for replicating the analyses and figures we present (Supplementary Material).

## 241 Results

242 The Stage 1 search found no articles that described genetic loci in humans with effects that  
243 were sexually antagonistic. In contrast, the Stage 2 search identified 32 articles that described  
244 variants with statistically significant sex-opposite or SA effects (Figure 1;  
245 <https://pubmed.ncbi.nlm.nih.gov/collections/60278165/?sort=pubdate>). From the studies  
246 examined, 51 SA variants were identified (Table 1), affecting 21 different complex traits (30  
247 loci) and 19 disease risk/severity traits (21 loci), with a large range of effect sizes. There were  
248 no variants affecting medical intervention traits that passed the screening process. The  
249 majority of alleles had effect sizes of similar absolute values in the two sexes, with larger  
250 effects tending to show greater differences on absolute effect size (Figure S3).

251 We found 22 studies provided sufficient data to allow the relationship between effect  
252 size ratio and effect allele frequency to be explored by statistical modelling. Trait class and its  
253 interaction with effect size ratio were initially included in the model but neither were found  
254 to have a significant effect (GLM: trait class dfs = 1,35, deviance =  $15.5 \times 10^3$ ,  $P = 0.965$ ;  
255 interaction dfs = 1,34, deviance = 1476,  $P = 0.989$ ) and were therefore excluded from the  
256 subsequent model in which effect size ratio was found to relate negatively to effect allele  
257 frequency, as predicted (GLM: estimate  $\pm$  SE =  $-1.10 \pm 0.50$ , dfs = 1,36, deviance =  $38.7 \times 10^6$ ,  
258  $P = 0.024$ ; Figure 2). For three loci there were data on effect sizes for more than one trait  
259 (Table 1), which introduced a degree of non-independence between these values in the  
260 dataset. However, resampling the data with effect sizes for only one trait for these three loci  
261 in turn and modelling these datasets in the same way (18 individual GLMs, dfs = 1,31) did not  
262 change the results qualitatively (minimum, maximum: model estimate = -1.0963, -1.0964;  
263 deviance =  $38.72 \times 10^6$ ,  $38.73 \times 10^6$ ;  $P = 0.03618$ , 0.03620).

264 Although the interaction term between trait type and effect size ratio was not  
265 significant we wanted to investigate whether the negative relationship between effect size  
266 ratio and effect allele frequency across all loci was repeated when the data was divided  
267 according to trait class, since while opposite effects on disease risk/severity may show a direct  
268 relationship with SA fitness effects, complex traits may or may not be experiencing SA  
269 selection, even if effects are in opposite directions in the two sexes. However, although the  
270 trends were both again negative as predicted, the generalized linear models of these smaller  
271 datasets were only marginally significant (complex traits model estimate  $\pm$  SE =  $-1.10 \pm 0.61$ ,  
272 dfs = 1,24, deviance =  $38.7 \times 10^6$ ,  $P = 0.065$ ; disease risk/severity model estimate  $\pm$  SE =  $-1.34$   
273  $\pm 0.77$ , dfs = 1,10, deviance =  $5.14 \times 10^4$ ,  $P = 0.053$ ; Figure S4). As for the full dataset, there  
274 was some lack of independence for the complex traits subset which contained loci with effect  
275 sizes for more than one trait. Again, resampling and modelling these datasets in the same  
276 way (18 individual glms, dfs 1, 22) did not change the results quantitatively (minimum,  
277 maximum: model estimate = -1.0960, -1.0961; deviance =  $38.669 \times 10^6$ ,  $38.675 \times 10^6$ ;  $P =$   
278 0.07774, 0.07776).

## 279 Discussion

280 The Stage 1 literature search of our systematic review focussed on finding reports of specific  
281 genetic loci in humans with evidence for SA effects using terminology normally associated

282 with the evolutionary concepts of sexual conflict or sexual antagonism. The Stage 2 search  
283 sought equivalent evidence, but used search terms that we anticipated would be used by  
284 scientists outside the field of evolutionary biology, who may not use the same terminology.  
285 Although the Stage 1 search did not find any examples of SA loci occurring in humans, the  
286 Stage 2 search identified 51 genetic loci across 39 studies that had ostensibly SA effects, but  
287 were not described as such. Clearly then the Stage 1 review failed to identify multiple relevant  
288 reports going back some 20 years because the terminology used in those reports did not  
289 match the conceptual framework of the search. The Stage 2 search may also be a lower limit  
290 given searches of other larger databases may also harbour further examples (see below).  
291 Although not yet validated, these reports nonetheless represent a substantial body of  
292 evidence that humans, like other organisms with separate sexes (Bonduriansky and  
293 Chenoweth, 2009), inevitably experience SA selection for a wide range of complex traits  
294 (Connallon and Clark, 2014; Garver-Apgar et al., 2011; Stearns et al., 2012; Stulp et al., 2012),  
295 as well as for a range of diseases.

296 A key prediction from a population genetic model of SA genetic variation is that SA  
297 alleles are expected to achieve higher equilibrium frequencies, without necessarily going to  
298 fixation, as the relative magnitude of the positive effect in one sex outweighs the negative  
299 effect in the opposite sex i.e. an increasingly negative effect size ratio (Morrow and Connallon,  
300 2013). We found clear support for this prediction, with a negative relationship between effect  
301 size ratio and allele frequency when examining all complex traits and diseases together (Fig  
302 2), although this relationship was only marginally significant when complex or disease trait  
303 classes were modelled separately (Fig S3). These results lend support to the view that the loci  
304 identified are genuinely experiencing SA selection, and although it is difficult to discern how  
305 selection acts on trait size in males and females for complex traits we would not expect the  
306 frequencies of disease-causing alleles to be so high under a mutation-selection balance. We  
307 were not able to look at the evolutionary history or age of these alleles due to limited  
308 information ( $n = 8$ ) (Albers and McVean, 2018), it would nonetheless be valuable to examine  
309 the population dynamics of these alleles over a broad timescale.

310 The loci showed a very broad range of effect sizes, from small to very large, with a  
311 generally symmetrical inverse relationship between effect size in one sex and the other  
312 (Figure S2), which is generally expected, since our screening process necessarily excluded  
313 studies reporting effects in the same direction across the two sexes. Nonetheless, it is striking

314 just how large some of the effects were, with very large negative effects in one sex  
315 simultaneously occurring with similarly large positive effects. Larger and more variable effect  
316 sizes are expected when sample sizes are small, a pattern we also found, which motivates  
317 further investigation of the traits and loci included in this review to elucidate more accurate  
318 estimates of real effect sizes.

319         The loci themselves fall within genes that influence a broad range of phenotypes,  
320 including morphological, physiological and behavioural complex traits, and a similarly diverse  
321 range of disease types, including various cancers, neurological disorders and immune system  
322 processes (see Table 1). For the most part, the diseases appear to be early-acting rather than  
323 late-onset, with the exception of perhaps bone mineral density. As such, it seems reasonable  
324 that an allele that increases disease risk or severity in these cases will indeed have a  
325 concomitant reduction in marginal fitness. Although a single large study identified several loci  
326 related to BMI adjusted waist-to-hip ratio, there is generally no overall bias towards one  
327 particular trait or disease class. The total number of loci is relatively small however, which  
328 may limit power to identify such biases if they exist. We also did not find any examples of SA  
329 loci on the X-chromosome, which may or may not be a hotspot of sexual antagonism (Fry,  
330 2010; Rice, 1984; Ruzicka and Connallon, 2020). This was expected given that it is commonly  
331 not included in genome-wide analyses (Wise et al., 2013), although most of the papers we  
332 reviewed were candidate gene studies. Nonetheless, we anticipate further examples may be  
333 identified should data from the X-chromosome be included systematically in association  
334 studies.

335         We also found evidence that some traits are influenced by more than one genetic  
336 variant in sex-opposite or SA ways ( $n=8$ ), or that some specific variants have pleiotropic  
337 effects on more than one trait or disease in a sex-opposite or SA way ( $n=6$ ; see Table 1). This  
338 complexity in the genetic architecture of traits or diseases may make conflict resolution  
339 particularly difficult, as a change in the allele at a single genetic locus experiencing SA  
340 selection may simultaneously influence multiple genes or phenotypes in both sexes in  
341 divergent ways (Fitzpatrick, 2004; Pennell and Morrow, 2013). Consequently, this may explain  
342 the persistence of intralocus sexual conflict at these loci. It may be that some of the remaining  
343 loci also have as yet unidentified pleiotropic effects with other traits or there are as yet  
344 unidentified SA loci influencing those same traits or diseases. Of the 51 variants identified, 4  
345 were confirmed to be haplotypes. Such variants, consisting of two or more SNPs in linkage

346 disequilibrium having a joint effect, could also present a problem for conflict resolution, since  
347 the ability of selection to act on any individual locus independent of the others in the linkage  
348 block is reduced for linked loci. This issue may also extend to other single variants reported  
349 here if they also occur in linkage blocks.

350         Although we have identified multiple genetic loci with either sex-opposite or SA  
351 effects these are likely outnumbered by those with either sex-specific (same direction but  
352 different magnitude) or sex-limited effects. For instance, Winkler et al. (2015) report 44 loci  
353 with sex-specific or sex-limited effects but only 11 with sex-opposite effects. Several other  
354 genome-wide association studies report sex-specific effects in several human diseases  
355 (Khramtsova et al., 2019), and a recent (non-systematic) review identified 37 SNPs with sex-  
356 dependent effects (Gilks et al., 2014). Detection of loci with SA versus sex-specific or sex-  
357 limited effects may differ systematically since we expect SA loci are more likely to persist at  
358 intermediate frequencies than loci with sex-specific effects (i.e. that differ between the sexes  
359 in magnitude but not sign). A larger systematic review that targeted variants with sex-specific  
360 or sex-dependent effects would therefore be a valuable contribution and enable us to more  
361 clearly understand how important SA alleles are relative to the broader context of genes with  
362 non-identical effects in the two sexes.

363         A key gap in our knowledge is whether the putative examples of sex-opposite or SA  
364 alleles presented here can be validated using independently derived datasets in the same or  
365 different sub-populations. For this, focussing on those variants associated with sex-  
366 differential disease risk would naturally be the most fruitful for advancing our knowledge of  
367 sexual antagonism in human disease. We therefore encourage specialists for the particular  
368 disease groups presented in Table 1 to include in the future the potential for SA genetic  
369 effects to occur when designing studies and analysing data. It is also important for all studies  
370 to report results in sufficient detail so that effect sizes can be calculated (if not given) as well  
371 as allele frequency data. Unfortunately, 17 studies failed to do this, so could not be included  
372 in our review and subsequent test of the evolutionary model. More generally, our study  
373 reinforces the view that sex is an important factor in shaping genetic associations with human  
374 traits and disease, even in divergent and contradictory ways, and so should always be  
375 considered when investigators examine genetic associations with phenotypes (Lee, 2018;  
376 Ober et al., 2008).

377           There is a possibility that some bias exists in the PubMed database against papers  
378 from the field of evolutionary biology, and if we had used another database then both stages  
379 would have returned valid papers. We subsequently (14<sup>th</sup> Dec 2020) sought to investigate this  
380 possibility with additional searches of Scopus and Web of Science. Repeating the Stage 1  
381 search initially returned 85 papers in Web of Science (Basic search of Topic, refined by  
382 “Human” within results) and 71 papers in Scopus (include keywords “Human”, exclude “Non-  
383 Human”), but again no papers made it through the screening process. Repeating the Stage 2  
384 search returned a much larger number of studies in both Web of Science (4,573; Basic search  
385 of Topic, refined by “Human” within results) and Scopus (6,616; Advanced search of Title-  
386 Abstract, filter: include human and humans, exclude nonhumans, Articles only), with 8,604  
387 unique records. This large number of records is too many to currently screen and may harbour  
388 further examples of SA loci in humans, but it is noteworthy that the majority of the initial list  
389 of studies found during Stage 2 using PubMed were also found in the other two databases  
390 (712 out of 881) as well as 28 out of the screened list of 32 studies identified in the current  
391 systematic review.

392           The disparity between the two stages of the review process provides a remarkable  
393 example of how discipline-specific terminology and concepts can hinder scientific  
394 communication between fields for substantial periods of time. For many of the studies  
395 identified in this review, the focus of the research was not on quantifying or even identifying  
396 sex-specific genetic effects in traits or disease, although they were tested for. The responses  
397 to such findings varied. Some framed these results as a major finding, others merely made  
398 note of them, with one suggesting that since the genetic associations were in opposite  
399 directions in the two sexes then it should be regarded as a false positive (Wong et al., 2005).  
400 It is possible, or even likely then that there exists a publication bias in the biomedical sciences  
401 against studies with apparently incongruous sex-opposite or SA effects, perhaps in part  
402 because the evolutionary framework that may provide a context for understanding those  
403 results is not generally appreciated or known. Of course, for evolutionary biologists interested  
404 in the role of SA selection on human traits and disease, this is clearly a problem. For many  
405 years no specific examples of SA loci were known in humans, and yet the first putative  
406 examples in fact appeared in the literature two decades ago. Our systematic review therefore  
407 provides a concrete illustration of how advances to both fields have likely been hampered by

408 a limited understanding of the theoretical framework and terminology used by the  
409 neighbouring field.

410 How can communication between the fields of medicine and evolutionary biology be  
411 facilitated? We do not have a comprehensive answer but clearly training in, or an increased  
412 awareness of, evolutionary medicine for scientists in both camps would probably be  
413 beneficial. The topic of evolutionary biology now forms a key part of the education for some  
414 biomedical scientists and clinicians. Similarly, evolutionary medicine is now frequently  
415 included in fundamental textbooks on evolution, and is being taught to students of  
416 evolutionary biology as part of their degree courses. These changes have been relatively  
417 recent, are far from being universally employed, but they should be encouraged. Funders of  
418 primary research are also now actively encouraging or obliging researchers to include sex as  
419 a factor when designing their studies (Clayton and Collins, 2014), although this may simply  
420 result in studies that aim to control for rather than investigate these effects explicitly.  
421 Consequently even this remedy may still preclude a deeper understanding of the origins of  
422 some human diseases.

423

## 424 Acknowledgements

425 We thank Jessica Abbott, Tim Connallon and Filip Ruzicka for comments on a previous version  
426 of the MS. Funding was provided by the Swedish Research Council (Grant number: 2019-  
427 03567) and by the Royal Society to EHM as a University Research Fellowship and  
428 Enhancement Award. TJ was funded by the Centre national de la recherche scientifique  
429 (CNRS) and the German Research Foundation (DFG grant number: JA 2653/2-1).

## 430 References

431 Albers, P.K., McVean, G., 2018. Dating genomic variants and shared ancestry in population-  
432 scale sequencing data (preprint). *Genomics*. <https://doi.org/10.1101/416610>  
433 Auton, A., Abecasis, G.R., Altshuler, D.M., Durbin, R.M., Abecasis, G.R., Bentley, D.R.,  
434 Chakravarti, A., Clark, A.G., Donnelly, P., Eichler, E.E., Flicek, P., Gabriel, S.B., Gibbs,  
435 R.A., Green, E.D., Hurler, M.E., Knoppers, B.M., Korbel, J.O., Lander, E.S., Lee, C.,  
436 Lehrach, H., Mardis, E.R., Marth, G.T., McVean, G.A., Nickerson, D.A., Schmidt, J.P.,  
437 Sherry, S.T., Wang, J., Wilson, R.K., Gibbs, R.A., Boerwinkle, E., Doddapaneni, H., Han,  
438 Y., Korchina, V., Kovar, C., Lee, S., Muzny, D., Reid, J.G., Zhu, Y., Wang, J., Chang, Y.,  
439 Feng, Q., Fang, X., Guo, X., Jian, M., Jiang, H., Jin, X., Lan, T., Li, G., Li, J., Li, Y., Liu, S.,  
440 Liu, X., Lu, Y., Ma, X., Tang, M., Wang, B., Wang, G., Wu, H., Wu, R., Xu, X., Yin, Y.,



441 Zhang, D., Zhang, W., Zhao, J., Zhao, M., Zheng, X., Lander, E.S., Altshuler, D.M.,  
442 Gabriel, S.B., Gupta, N., Gharani, N., Toji, L.H., Gerry, N.P., Resch, A.M., Flicek, P.,  
443 Barker, J., Clarke, L., Gil, L., Hunt, S.E., Kelman, G., Kulesha, E., Leinonen, R., McLaren,  
444 W.M., Radhakrishnan, R., Roa, A., Smirnov, D., Smith, R.E., Streeter, I., Thormann, A.,  
445 Toneva, I., Vaughan, B., Zheng-Bradley, X., Bentley, D.R., Grocock, R., Humphray, S.,  
446 James, T., Kingsbury, Z., Lehrach, H., Sudbrak, R., Albrecht, M.W., Amstislavskiy, V.S.,  
447 Borodina, T.A., Lienhard, M., Mertes, F., Sultan, M., Timmermann, B., Yaspo, M.-L.,  
448 Mardis, E.R., Wilson, R.K., Fulton, L., Fulton, R., Sherry, S.T., Ananiev, V., Belaia, Z.,  
449 Beloslyudtsev, D., Bouk, N., Chen, C., Church, D., Cohen, R., Cook, C., Garner, J.,  
450 Hefferon, T., Kimelman, M., Liu, C., Lopez, J., Meric, P., O’Sullivan, C., Ostapchuk, Y.,  
451 Phan, L., Ponomarov, S., Schneider, V., Shekhtman, E., Sirotkin, K., Slotta, D., Zhang,  
452 H., McVean, G.A., Durbin, R.M., Balasubramaniam, S., Burton, J., Danecek, P., Keane,  
453 T.M., Kolb-Kokocinski, A., McCarthy, S., Stalker, J., Quail, M., Schmidt, J.P., Davies,  
454 C.J., Gollub, J., Webster, T., Wong, B., Zhan, Y., Auton, A., Campbell, C.L., Kong, Y.,  
455 Marcketta, A., Gibbs, R.A., Yu, F., Antunes, L., Bainbridge, M., Muzny, D., Sabo, A.,  
456 Huang, Z., Wang, J., Coin, L.J.M., Fang, L., Guo, X., Jin, X., Li, G., Li, Q., Li, Y., Li, Z., Lin,  
457 H., Liu, B., Luo, R., Shao, H., Xie, Y., Ye, C., Yu, C., Zhang, F., Zheng, H., Zhu, H., Alkan,  
458 C., Dal, E., Kahveci, F., Marth, G.T., Garrison, E.P., Kural, D., Lee, W.-P., Fung Leong,  
459 W., Stromberg, M., Ward, A.N., Wu, J., Zhang, M., Daly, M.J., DePristo, M.A.,  
460 Handsaker, R.E., Altshuler, D.M., Banks, E., Bhatia, G., del Angel, G., Gabriel, S.B.,  
461 Genovese, G., Gupta, N., Li, H., Kashin, S., Lander, E.S., McCarroll, S.A., Nemes, J.C.,  
462 Poplin, R.E., Yoon, S.C., Lihm, J., Makarov, V., Clark, A.G., Gottipati, S., Keinan, A.,  
463 Rodriguez-Flores, J.L., Korbel, J.O., Rausch, T., Fritz, M.H., Stütz, A.M., Flicek, P., Beal,  
464 K., Clarke, L., Datta, A., Herrero, J., McLaren, W.M., Ritchie, G.R.S., Smith, R.E.,  
465 Zerbino, D., Zheng-Bradley, X., Sabeti, P.C., Shlyakhter, I., Schaffner, S.F., Vitti, J.,  
466 Cooper, D.N., Ball, E.V., Stenson, P.D., Bentley, D.R., Barnes, B., Bauer, M., Keira  
467 Cheetham, R., Cox, A., Eberle, M., Humphray, S., Kahn, S., Murray, L., Peden, J.,  
468 Shaw, R., Kenny, E.E., Batzer, M.A., Konkel, M.K., Walker, J.A., MacArthur, D.G., Lek,  
469 M., Sudbrak, R., Amstislavskiy, V.S., Herwig, R., Mardis, E.R., Ding, L., Koboldt, D.C.,  
470 Larson, D., Ye, K., Gravel, S., The 1000 Genomes Project Consortium, Corresponding  
471 authors, Steering committee, Production group, Baylor College of Medicine, BGI-  
472 Shenzhen, Broad Institute of MIT and Harvard, Coriell Institute for Medical Research,  
473 European Molecular Biology Laboratory, E.B.I., Illumina, Max Planck Institute for  
474 Molecular Genetics, McDonnell Genome Institute at Washington University, US  
475 National Institutes of Health, University of Oxford, Wellcome Trust Sanger Institute,  
476 Analysis group, Affymetrix, Albert Einstein College of Medicine, Bilkent University,  
477 Boston College, Cold Spring Harbor Laboratory, Cornell University, European  
478 Molecular Biology Laboratory, Harvard University, Human Gene Mutation Database,  
479 Icahn School of Medicine at Mount Sinai, Louisiana State University, Massachusetts  
480 General Hospital, McGill University, National Eye Institute, N., 2015. A global  
481 reference for human genetic variation. *Nature* 526, 68–74.  
482 <https://doi.org/10.1038/nature15393>  
483 Barson, N.J., Aykanat, T., Hindar, K., Baranski, M., Bolstad, G.H., Fiske, P., Jacq, C., Jensen,  
484 A.J., Johnston, S.E., Karlsson, S., Kent, M., Moen, T., Niemelä, E., Nome, T., Næsje,  
485 T.F., Orell, P., Romakkaniemi, A., Sægrov, H., Urdal, K., Erkinaro, J., Lien, S., Primmer,  
486 C.R., 2015. Sex-dependent dominance at a single locus maintains variation in age at  
487 maturity in salmon. *Nature* 528, 405–408. <https://doi.org/10.1038/nature16062>



- 488 Bonduriansky, R., Chenoweth, S.F., 2009. Intralocus sexual conflict. *Trends Ecol Evol* 24,  
489 280–288.
- 490 Borenstein, M., 2009. Converting Among Effect Sizes, in: *Introduction to Meta-Analysis*. John  
491 Wiley & Sons, Ltd, pp. 45–49. <https://doi.org/10.1002/9780470743386.ch7>
- 492 Camus, M.F., Wolf, J.B.W., Morrow, E.H., Dowling, D.K., 2015. Single Nucleotides in the  
493 mtDNA Sequence Modify Mitochondrial Molecular Function and Are Associated with  
494 Sex-Specific Effects on Fertility and Aging. *Curr. Biol.* 25, 2717–2722.  
495 <https://doi.org/10.1016/j.cub.2015.09.012>
- 496 Carlson, J.C., Nidey, N.L., Butali, A., Buxo, C.J., Christensen, K., Deleyiannis, F.W.-D., Hecht,  
497 J.T., Field, L.L., Moreno-Uribe, L.M., Orioli, I.M., Poletta, F.A., Padilla, C., Vieira, A.R.,  
498 Weinberg, S.M., Wehby, G.L., Feingold, E., Murray, J.C., Marazita, M.L., Leslie, E.J.,  
499 2018. Genome-wide interaction studies identify sex-specific risk alleles for  
500 nonsyndromic orofacial clefts. *Genet. Epidemiol.* 42, 664–672.  
501 <https://doi.org/10.1002/gepi.22158>
- 502 Chippindale, A.K., Gibson, J.R., Rice, W.R., 2001. Negative genetic correlation for adult  
503 fitness between sexes reveals ontogenetic conflict in *Drosophila*. *Proc. Natl. Acad.*  
504 *Sci. USA* 98, 1671–1675.
- 505 Cicchetti, D., Rogosch, F.A., Hecht, K.F., Crick, N.R., Hetzel, S., 2014. Moderation of  
506 maltreatment effects on childhood borderline personality symptoms by gender and  
507 oxytocin receptor and FK506 binding protein 5 genes. *Dev. Psychopathol.* 26, 831–  
508 849. <https://doi.org/10.1017/S095457941400042X>
- 509 Clayton, J.A., Collins, F.S., 2014. Policy: NIH to balance sex in cell and animal studies. *Nature*  
510 509, 282–283. <https://doi.org/10.1038/509282a>
- 511 Connallon, T., Clark, A., G., 2014. Evolutionary inevitability of sexual antagonism. *Proc. R.*  
512 *Soc. B Biol. Sci.* 281, 20132123. <https://doi.org/10.1098/rspb.2013.2123>
- 513 Connallon, T., Clark, A.G., 2013. Antagonistic Versus Nonantagonistic Models of Balancing  
514 Selection: Characterizing the Relative Timescales and Hitchhiking Effects of Partial  
515 Selective Sweeps. *Evolution* 67, 908–917. <https://doi.org/10.1111/j.1558-5646.2012.01800.x>
- 516
- 517 Dauvilliers, Y., Neidhart, E., Lecendreux, M., Billiard, M., Tafti, M., 2001. MAO-A and COMT  
518 polymorphisms and gene effects in narcolepsy. *Mol. Psychiatry* 6, 367–372.  
519 <https://doi.org/10.1038/sj.mp.4000911>
- 520 Dixon, A., 2009. Dixon, A. F. (2009) *Sexual selection and the Origins of Human Mating*  
521 *Systems*. Oxford University Press, UK.
- 522 Ellegren, H., Parsch, J., 2007. The evolution of sex-biased genes and sex-biased gene  
523 expression. *Nat Rev Genet* 8, 689–698. <https://doi.org/10.1038/nrg2167>
- 524 Fillingim, R.B., Kaplan, L., Staud, R., Ness, T.J., Glover, T.L., Campbell, C.M., Mogil, J.S.,  
525 Wallace, M.R., 2005. The A118G single nucleotide polymorphism of the mu-opioid  
526 receptor gene (OPRM1) is associated with pressure pain sensitivity in humans. *J. Pain*  
527 *Off. J. Am. Pain Soc.* 6, 159–167. <https://doi.org/10.1016/j.jpain.2004.11.008>
- 528 Fitzpatrick, M.J., 2004. Pleiotropy and the genomic location of sexually selected genes. *Am.*  
529 *Nat.* 163, 800–808. <https://doi.org/10.1086/386297>
- 530 Foerster, K., Coulson, T., Sheldon, B.C., Pemberton, J.M., Clutton-Brock, T., Kruuk, L.E.B.,  
531 2007. Sexually antagonistic genetic variation for fitness in red deer. *Nature* 447,  
532 1107–1110.
- 533 Franck, N., Lanne, T., Astrand, O., Engvall, J., Lindstrom, T., Ostgren, C.J., Nystrom, F.H.,  
534 2012. Cardiovascular risk factors related to the PPARgamma Pro12Ala polymorphism

- 535 in patients with type 2 diabetes are gender dependent. *Blood Press.* 21, 122–127.  
536 <https://doi.org/10.3109/08037051.2011.623349>
- 537 Fry, J.D., 2010. The Genomic Location of Sexually Antagonistic Variation: Some Cautionary  
538 Comments. *Evolution* 64, 1510–1516. [https://doi.org/10.1111/j.1558-](https://doi.org/10.1111/j.1558-5646.2009.00898.x)  
539 [5646.2009.00898.x](https://doi.org/10.1111/j.1558-5646.2009.00898.x)
- 540 Garver-Apgar, C.E., Eaton, M.A., Tybur, J.M., Emery Thompson, M., 2011. Evidence of  
541 intralocus sexual conflict: physically and hormonally masculine individuals have more  
542 attractive brothers relative to sisters. *Evol. Hum. Behav.* 32, 423–432.  
543 <https://doi.org/10.1016/j.evolhumbehav.2011.03.005>
- 544 Gastaldi, M., Diziere, S., Defoort, C., Portugal, H., Lairon, D., Darmon, M., Planells, R., 2007.  
545 Sex-specific association of fatty acid binding protein 2 and microsomal triacylglycerol  
546 transfer protein variants with response to dietary lipid changes in the 3-mo Medi-  
547 RIVAGE primary intervention study. *Am. J. Clin. Nutr.* 86, 1633–1641.  
548 <https://doi.org/10.1093/ajcn/86.5.1633>
- 549 Gilks, W.P., Abbott, J.K., Morrow, E.H., 2014. Sex differences in disease genetics: evidence,  
550 evolution, and detection. *Trends Genet.* 30, 453–463.  
551 <https://doi.org/10.1016/j.tig.2014.08.006>
- 552 Gloria-Bottini, F., Bottini, N., Renzetti, G., Bottini, E., 2007. ACP1 and Th class of  
553 immunological disease: evidence of interaction with gender. *Int. Arch. Allergy*  
554 *Immunol.* 143, 170–176. <https://doi.org/10.1159/000099308>
- 555 Grieshop, K., Arnvist, G., 2018. Sex-specific dominance reversal of genetic variation for  
556 fitness. *PLOS Biol.* 16, e2006810. <https://doi.org/10.1371/journal.pbio.2006810>
- 557 Gurevitch, J., Koricheva, J., Mengersen, K., 2013. Handbook of Meta-Analysis In Ecology and  
558 Evolution, Handbook of Meta-analysis in Ecology and Evolution.  
559 <https://doi.org/10.1515/9781400846184>
- 560 Herman, A.I., Conner, T.S., Anton, R.F., Gelernter, J., Kranzler, H.R., Covault, J., 2011.  
561 Variation in the gene encoding the serotonin transporter is associated with a  
562 measure of sociopathy in alcoholics. *Addict. Biol.* 16, 124–132.  
563 <https://doi.org/10.1111/j.1369-1600.2009.00197.x>
- 564 Khramtsova, E.A., Davis, L.K., Stranger, B.E., 2019. The role of sex in the genomics of human  
565 complex traits. *Nat. Rev. Genet.* 20, 173–190. [https://doi.org/10.1038/s41576-018-](https://doi.org/10.1038/s41576-018-0083-1)  
566 [0083-1](https://doi.org/10.1038/s41576-018-0083-1)
- 567 Kim, B., Kim, H., Joo, Y.H., Lim, J., Kim, C.-Y., Song, K., 2010. Sex-different association of DAO  
568 with schizophrenia in Koreans. *Psychiatry Res.* 179, 121–125.  
569 <https://doi.org/10.1016/j.psychres.2008.08.009>
- 570 Kiy, A., Wilhelm, O., Hildebrandt, A., Reuter, M., Sommer, W., 2013. On the genetic basis of  
571 face cognition and its relation to fluid cognitive abilities. *Genes Brain Behav.* 12, 438–  
572 445. <https://doi.org/10.1111/gbb.12034>
- 573 Korner, A., Ma, L., Franks, P.W., Kiess, W., Baier, L.J., Stumvoll, M., Kovacs, P., 2007. Sex-  
574 specific effect of the Val1483Ile polymorphism in the fatty acid synthase gene (FAS)  
575 on body mass index and lipid profile in Caucasian children. *Int. J. Obes.* 2005 31,  
576 353–358. <https://doi.org/10.1038/sj.ijo.0803428>
- 577 Lajeunesse, M., 2013. Recovering missing or partial data from studies: A survey of  
578 conversions and imputations for meta-analysis. pp. 195–206.
- 579 Lande, R., 1980. Sexual dimorphism, sexual selection, and adaptation in polygenic  
580 characters. *Evolution* 34, 292–305.

- 581 Lang, U.E., Hellweg, R., Bajbouj, M., Gaus, V., Sander, T., Gallinat, J., 2008. Gender-  
582 dependent association of a functional NGF polymorphism with anxiety-related  
583 personality traits. *Pharmacopsychiatry* 41, 196–199. [https://doi.org/10.1055/s-0028-](https://doi.org/10.1055/s-0028-1082070)  
584 [1082070](https://doi.org/10.1055/s-0028-1082070)
- 585 Lauritzen, L., Sorensen, L.B., Harslof, L.B., Ritz, C., Stark, K.D., Astrup, A., Dyssegaard, C.B.,  
586 Egelund, N., Michaelsen, K.F., Damsgaard, C.T., 2017. Mendelian randomization  
587 shows sex-specific associations between long-chain. *Am. J. Clin. Nutr.* 106, 88–95.  
588 <https://doi.org/10.3945/ajcn.117.152595>
- 589 Lee, S.K., 2018. Sex as an important biological variable in biomedical research. *BMB Rep.* 51,  
590 167–173. <https://doi.org/10.5483/BMBRep.2018.51.4.034>
- 591 Liu, Y.-H., Chen, Y.-J., Wu, H.-H., Wang, T.-Y., Tsai, F.-J., 2014. Single nucleotide  
592 polymorphisms at the PRR3, ABCF1, and GNL1 genes in the HLA class I region are  
593 associated with Graves' ophthalmopathy in a gender-dependent manner.  
594 *Ophthalmology* 121, 2033–2039. <https://doi.org/10.1016/j.ophtha.2014.04.027>
- 595 Ljungberg, L.U., Ostgren, C.J., Nystrom, F.H., Lanne, T., 2014. Associations of genetic  
596 polymorphisms in the renin-angiotensin system with central aortic and ambulatory  
597 blood pressure in type 2 diabetic patients. *J. Renin-Angiotensin-Aldosterone Syst.*  
598 *JRAAS* 15, 61–68. <https://doi.org/10.1177/1470320312474052>
- 599 McCarthy, J.J., Somji, A., Weiss, L.A., Steffy, B., Vega, R., Barrett-Connor, E., Talavera, G.,  
600 Glynne, R., 2009. Polymorphisms of the scavenger receptor class B member 1 are  
601 associated with insulin resistance with evidence of gene by sex interaction. *J. Clin.*  
602 *Endocrinol. Metab.* 94, 1789–1796. <https://doi.org/10.1210/jc.2008-2800>
- 603 Mills, S.C., Koskela, E., Mappes, T., 2011. Intralocus sexual conflict for fitness: sexually  
604 antagonistic alleles for testosterone. *Proc. R. Soc. B Biol. Sci.* *rsb20112340*.  
605 <https://doi.org/10.1098/rspb.2011.2340>
- 606 Moher, D., Liberati, A., Tetzlaff, J., Altman, D.G., Group, T.P., 2009. Preferred Reporting  
607 Items for Systematic Reviews and Meta-Analyses: The PRISMA Statement. *PLOS*  
608 *Med.* 6, e1000097. <https://doi.org/10.1371/journal.pmed.1000097>
- 609 Morea, A., Cameran, M., Rebuffi, A.G., Marzenta, D., Marangon, O., Picci, L., Zacchello, F.,  
610 Scarpa, M., 2005. Gender-sensitive association of CFTR gene mutations and 5T allele  
611 emerging from a large survey on infertility. *Mol. Hum. Reprod.* 11, 607–614.  
612 <https://doi.org/10.1093/molehr/gah214>
- 613 Morrow, E.H., 2015. The evolution of sex differences in disease. *Biol. Sex Differ.* 6, 5.  
614 <https://doi.org/10.1186/s13293-015-0023-0>
- 615 Morrow, E.H., Connallon, T., 2013. Implications of sex-specific selection for the genetic basis  
616 of disease. *Evol. Appl.* 6, 1208–1217. <https://doi.org/10.1111/eva.12097>
- 617 Nesse, R.M., Williams, G.C., 1994. *Why we get sick: The new science of Darwinian medicine.*  
618 Vintage, New York.
- 619 Ober, C., Loisel, D.A., Gilad, Y., 2008. Sex-specific genetic architecture of human disease. *Nat*  
620 *Rev Genet* 9, 911–922. <https://doi.org/10.1038/nrg2415>
- 621 Ober, C., Pan, L., Phillips, N., Parry, R., Kurina, L.M., 2006. Sex-specific genetic architecture of  
622 asthma-associated quantitative trait loci in a founder population. *Curr. Allergy*  
623 *Asthma Rep.* 6, 241–246. <https://doi.org/10.1007/s11882-006-0041-4>
- 624 Ovadia, G., Shifman, S., 2011. The genetic variation of RELN expression in schizophrenia and  
625 bipolar disorder. *PloS One* 6, e19955. <https://doi.org/10.1371/journal.pone.0019955>
- 626 Padmanabhan, S., Menni, C., Lee, W.K., Laing, S., Brambilla, P., Sega, R., Perego, R., Grassi,  
627 G., Cesana, G., Delles, C., Mancina, G., Dominiczak, A.F., 2010. The effects of sex and

- 628 method of blood pressure measurement on genetic associations with blood pressure  
629 in the PAMELA study. *J. Hypertens.* 28, 465–477.  
630 <https://doi.org/10.1097/HJH.0b013e32833594d7>
- 631 Parker, G.A., 1979. SEXUAL SELECTION AND SEXUAL CONFLICT, in: *Sexual Selection and*  
632 *Reproductive Competition in Insects.* Elsevier, pp. 123–166.  
633 <https://doi.org/10.1016/B978-0-12-108750-0.50010-0>
- 634 Parker, G.A., Baker, R.R., Smith, V.G.F., 1972. The origin and evolution of gamete  
635 dimorphism and the male-female phenomenon. *J. Theor. Biol.* 36, 529–553.
- 636 Payne, E.H., Gebregziabher, M., Hardin, J.W., Ramakrishnan, V., Egede, L.E., 2018. An  
637 empirical approach to determine a threshold for assessing overdispersion in Poisson  
638 and negative binomial models for count data. *Commun. Stat. Simul. Comput.* 47,  
639 1722–1738. <https://doi.org/10.1080/03610918.2017.1323223>
- 640 Peng, Y.-M., Lei, S.-F., Guo, Y., Xiong, D.-H., Yan, H., Wang, L., Guo, Y.-F., Deng, H.-W., 2008.  
641 Sex-specific association of the glucocorticoid receptor gene with extreme BMD. *J.*  
642 *Bone Miner. Res. Off. J. Am. Soc. Bone Miner. Res.* 23, 247–252.  
643 <https://doi.org/10.1359/jbmr.071017>
- 644 Pennell, T.M., Haas, F.J.H. de, Morrow, E.H., Doorn, G.S. van, 2016. Contrasting effects of  
645 intralocus sexual conflict on sexually antagonistic coevolution. *Proc. Natl. Acad. Sci.*  
646 113, E978–E986. <https://doi.org/10.1073/pnas.1514328113>
- 647 Pennell, T.M., Morrow, E.H., 2013. Two sexes, one genome: the evolutionary dynamics of  
648 intralocus sexual conflict. *Ecol. Evol.* 3, 1819–1834.  
649 <https://doi.org/10.1002/ece3.540>
- 650 Press, O.A., Zhang, W., Gordon, M.A., Yang, D., Haiman, C.A., Azuma, M., Iqbal, S., Lenz, H.-  
651 J., 2011. Gender-related survival differences associated with polymorphic variants of  
652 estrogen receptor-beta (ERbeta) in patients with metastatic colon cancer.  
653 *Pharmacogenomics J.* 11, 375–382. <https://doi.org/10.1038/tpj.2010.45>
- 654 Price, J.S., Strong, J., Eliassen, J., McQueeney, T., Miller, M., Padula, C.B., Shear, P., Lisdahl, K.,  
655 2013. Serotonin transporter gene moderates associations between mood, memory  
656 and hippocampal volume. *Behav. Brain Res.* 242, 158–165.  
657 <https://doi.org/10.1016/j.bbr.2012.11.013>
- 658 Rice, W.R., 1992. Sexually antagonistic genes: experimental evidence. *Science* 256, 1436–  
659 1439. <https://doi.org/10.1126/science.1604317>
- 660 Rice, W.R., 1984. Sex chromosomes and the evolution of sexual dimorphism. *Evolution* 38,  
661 735–742.
- 662 Rigby, N., Kulathinal, R.J., 2015. Genetic Architecture of Sexual Dimorphism in Humans. *J.*  
663 *Cell. Physiol.* 230, 2304–2310. <https://doi.org/10.1002/jcp.24979>
- 664 Rostant, W.G., Kay, C., Wedell, N., Hosken, D.J., 2015. Sexual conflict maintains variation at  
665 an insecticide resistance locus. *BMC Biol.* 13. [https://doi.org/10.1186/s12915-015-](https://doi.org/10.1186/s12915-015-0143-3)  
666 0143-3
- 667 Ruzicka, F., Connallon, T., 2020. Is the X chromosome a hot spot for sexually antagonistic  
668 polymorphisms? Biases in current empirical tests of classical theory. *Proc. R. Soc. B.*  
669 <https://doi.org/10.1098/rspb.2020.1869>
- 670 Ruzicka, F., Dutoit, L., Czuppon, P., Jordan, C.Y., Li, X.-Y., Olito, C., Runemark, A., Svensson,  
671 E.I., Yazdi, H.P., Connallon, T., 2020. The search for sexually antagonistic genes:  
672 Practical insights from studies of local adaptation and statistical genomics. *Evol. Lett.*  
673 4–5, 398–415. <https://doi.org/10.1002/evl3.192>



- 674 Ruzicka, F., Hill, M.S., Pennell, T.M., Flis, I., Ingleby, F.C., Mott, R., Fowler, K., Morrow, E.H.,  
675 Reuter, M., 2019. Genome-wide sexually antagonistic variants reveal long-standing  
676 constraints on sexual dimorphism in fruit flies. *PLoS Biol.* 17, e3000244.
- 677 Sainz, J., Rudolph, A., Hoffmeister, M., Frank, B., Brenner, H., Chang-Claude, J., Hemminki,  
678 K., Forsti, A., 2012. Effect of type 2 diabetes predisposing genetic variants on  
679 colorectal cancer risk. *J. Clin. Endocrinol. Metab.* 97, E845-851.  
680 <https://doi.org/10.1210/jc.2011-2565>
- 681 Sangalli, A., Orlandi, E., Poli, A., Maurichi, A., Santinami, M., Nicolis, M., Ferronato, S.,  
682 Malerba, G., Rodolfo, M., Gomez Lira, M., 2017. Sex-specific effect of RNASEL  
683 rs486907 and miR-146a rs2910164 polymorphisms' interaction as a susceptibility  
684 factor for melanoma skin cancer. *Melanoma Res.* 27, 309–314.  
685 <https://doi.org/10.1097/CMR.0000000000000360>
- 686 Schneider, K.K., Hule, L., Schote, A.B., Meyer, J., Frings, C., 2015. Sex matters! Interactions of  
687 sex and polymorphisms of a cholinergic receptor gene (CHRNA5) modulate response  
688 speed. *Neuroreport* 26, 186–191. <https://doi.org/10.1097/WNR.0000000000000313>
- 689 Schuurhof, A., Bont, L., Siezen, C.L.E., Hodemaekers, H., van Houwelingen, H.C., Kimman,  
690 T.G., Hoebee, B., Kimpfen, J.L.L., Janssen, R., 2010. Interleukin-9 polymorphism in  
691 infants with respiratory syncytial virus infection: an opposite effect in boys and girls.  
692 *Pediatr. Pulmonol.* 45, 608–613. <https://doi.org/10.1002/ppul.21229>
- 693 Shalev, I., Lerer, E., Israel, S., Uzefovsky, F., Gritsenko, I., Mankuta, D., Ebstein, R.P., Kaitz,  
694 M., 2009. BDNF Val66Met polymorphism is associated with HPA axis reactivity to  
695 psychological stress characterized by genotype and gender interactions.  
696 *Psychoneuroendocrinology* 34, 382–388.  
697 <https://doi.org/10.1016/j.psyneuen.2008.09.017>
- 698 Short, R.V., 1979. Sexual selection and its component parts, somatic and genital selection, as  
699 illustrated by man and the great apes. *Adv. Study Behav.* 9, 131–158.
- 700 Sjoberg, R.L., Nilsson, K.W., Nordquist, N., Ohrvik, J., Leppert, J., Lindstrom, L., Orelund, L.,  
701 2006. Development of depression: sex and the interaction between environment  
702 and a promoter polymorphism of the serotonin transporter gene. *Int. J.*  
703 *Neuropsychopharmacol.* 9, 443–449. <https://doi.org/10.1017/S1461145705005936>
- 704 Stearns, S.C., Govindaraju, D.R., Ewbank, D., Byars, S.G., 2012. Constraints on the  
705 coevolution of contemporary human males and females. *Proc. R. Soc. B Biol. Sci.* 279,  
706 4836–4844. <https://doi.org/10.1098/rspb.2012.2024>
- 707 Stulp, G., Kuijper, B., Buunk, A.P., Pollet, T.V., Verhulst, S., 2012. Intralocus sexual conflict  
708 over human height. *Biol. Lett.* <https://doi.org/10.1098/rsbl.2012.0590>
- 709 Winkler, T.W., Justice, A.E., Graff, M., Barata, L., Feitosa, M.F., Chu, S., Czajkowski, J., Esko,  
710 T., Fall, T., Kilpeläinen, T.O., Lu, Y., Mägi, R., Mihailov, E., Pers, T.H., Rieger, S.,  
711 Teumer, A., Ehret, G.B., Ferreira, T., Heard-Costa, N.L., Karjalainen, J., Lagou, V.,  
712 Mahajan, A., Neinast, M.D., Prokopenko, I., Simino, J., Teslovich, T.M., Jansen, R.,  
713 Westra, H.-J., White, C.C., Absher, D., Ahluwalia, T.S., Ahmad, S., Albrecht, E., Alves,  
714 A.C., Bragg-Gresham, J.L., Craen, A.J.M. de, Bis, J.C., Bonnefond, A., Boucher, G.,  
715 Cadby, G., Cheng, Y.-C., Chiang, C.W.K., Delgado, G., Demirkan, A., Dueker, N.,  
716 Eklund, N., Eiriksdottir, G., Eriksson, J., Feenstra, B., Fischer, K., Frau, F., Galesloot,  
717 T.E., Geller, F., Goel, A., Gorski, M., Grammer, T.B., Gustafsson, S., Haitjema, S.,  
718 Hottenga, J.-J., Huffman, J.E., Jackson, A.U., Jacobs, K.B., Johansson, Å., Kaakinen, M.,  
719 Kleber, M.E., Lahti, J., Leach, I.M., Lehne, B., Liu, Y., Lo, K.S., Lorentzon, M., Luan, J.,  
720 Madden, P.A.F., Mangino, M., McKnight, B., Medina-Gomez, C., Monda, K.L.,

721 Montasser, M.E., Müller, G., Müller-Nurasyid, M., Nolte, I.M., Panoutsopoulou, K.,  
722 Pascoe, L., Paternoster, L., Rayner, N.W., Renström, F., Rizzi, F., Rose, L.M., Ryan,  
723 K.A., Salo, P., Sanna, S., Scharnagl, H., Shi, J., Smith, A.V., Southam, L., Stančáková, A.,  
724 Steinthorsdottir, V., Strawbridge, R.J., Sung, Y.J., Tachmazidou, I., Tanaka, T.,  
725 Thorleifsson, G., Trompet, S., Pervjakova, N., Tyrer, J.P., Vandenput, L., Laan, S.W.  
726 van der, Velde, N. van der, Setten, J. van, Vliet-Ostaptchouk, J.V. van, Verweij, N.,  
727 Vlachopoulou, E., Waite, L.L., Wang, S.R., Wang, Z., Wild, S.H., Willenborg, C., Wilson,  
728 J.F., Wong, A., Yang, J., Yengo, L., Yerges-Armstrong, L.M., Yu, L., Zhang, W., Zhao,  
729 J.H., Andersson, E.A., Bakker, S.J.L., Baldassarre, D., Banasik, K., Barcella, M.,  
730 Barlassina, C., Bellis, C., Benaglio, P., Blangero, J., Blüher, M., Bonnet, F.,  
731 Bonnycastle, L.L., Boyd, H.A., Bruinenberg, M., Buchman, A.S., Campbell, H., Chen,  
732 Y.-D.I., Chines, P.S., Claudi-Boehm, S., Cole, J., Collins, F.S., Geus, E.J.C. de, Groot,  
733 L.C.P.G.M. de, Dimitriou, M., Duan, J., Enroth, S., Eury, E., Farmaki, A.-E., Forouhi,  
734 N.G., Friedrich, N., Gejman, P.V., Gigante, B., Glorioso, N., Go, A.S., Gottesman, O.,  
735 Gräßler, J., Grallert, H., Grarup, N., Gu, Y.-M., Broer, L., Ham, A.C., Hansen, T., Harris,  
736 T.B., Hartman, C.A., Hassinen, M., Hastie, N., Hattersley, A.T., Heath, A.C., Henders,  
737 A.K., Hernandez, D., Hillege, H., Holmen, O., Hovingh, K.G., Hui, J., Husemoen, L.L.,  
738 Hutri-Kähönen, N., Hysi, P.G., Illig, T., Jager, P.L.D., Jalilzadeh, S., Jørgensen, T.,  
739 Jukema, J.W., Juonala, M., Kanoni, S., Karaleftheri, M., Khaw, K.T., Kinnunen, L.,  
740 Kittner, S.J., Koenig, W., Kolcic, I., Kovacs, P., Krarup, N.T., Kratzer, W., Krüger, J.,  
741 Kuh, D., Kumari, M., Kyriakou, T., Langenberg, C., Lannfelt, L., Lanzani, C., Lotay, V.,  
742 Launer, L.J., Leander, K., Lindström, J., Linneberg, A., Liu, Y.-P., Lobbens, S., Luben, R.,  
743 Lyssenko, V., Männistö, S., Magnusson, P.K., McArdle, W.L., Menni, C., Merger, S.,  
744 Milani, L., Montgomery, G.W., Morris, A.P., Narisu, N., Nelis, M., Ong, K.K., Palotie,  
745 A., Pérusse, L., Pichler, I., Pilia, M.G., Pouta, A., Rheinberger, M., Ribel-Madsen, R.,  
746 Richards, M., Rice, K.M., Rice, T.K., Rivolta, C., Salomaa, V., Sanders, A.R., Sarzynski,  
747 M.A., Scholtens, S., Scott, R.A., Scott, W.R., Sebert, S., Sengupta, S., Sennblad, B.,  
748 Seufferlein, T., Silveira, A., Slagboom, P.E., Smit, J.H., Sparsø, T.H., Stirrups, K., Stolk,  
749 R.P., Stringham, H.M., Swertz, M.A., Swift, A.J., Syvänen, A.-C., Tan, S.-T., Thorand,  
750 B., Tönjes, A., Tremblay, A., Tsfantakis, E., Most, P.J. van der, Völker, U., Vohl, M.-C.,  
751 Vonk, J.M., Waldenberger, M., Walker, R.W., Wennauer, R., Widén, E., Willemsen,  
752 G., Wilsgaard, T., Wright, A.F., Zillikens, M.C., Dijk, S.C. van, Schoor, N.M. van,  
753 Asselbergs, F.W., Bakker, P.I.W. de, Beckmann, J.S., Beilby, J., Bennett, D.A.,  
754 Bergman, R.N., Bergmann, S., Böger, C.A., Boehm, B.O., Boerwinkle, E., Boomsma,  
755 D.I., Bornstein, S.R., Bottinger, E.P., Bouchard, C., Chambers, J.C., Chanock, S.J.,  
756 Chasman, D.I., Cucca, F., Cusi, D., Dedoussis, G., Erdmann, J., Eriksson, J.G., Evans,  
757 D.A., Faire, U. de, Farrall, M., Ferrucci, L., Ford, I., Franke, L., Franks, P.W., Froguel, P.,  
758 Gansevoort, R.T., Gieger, C., Grönberg, H., Gudnason, V., Gyllensten, U., Hall, P.,  
759 Hamsten, A., Harst, P. van der, Hayward, C., Heliövaara, M., Hengstenberg, C., Hicks,  
760 A.A., Hingorani, A., Hofman, A., Hu, F., Huikuri, H.V., Hveem, K., James, A.L., Jordan,  
761 J.M., Jula, A., Kähönen, M., Kajantie, E., Kathiresan, S., Kiemenev, L.A.L.M., Kivimäki,  
762 M., Knekt, P.B., Koistinen, H.A., Kooner, J.S., Koskinen, S., Kuusisto, J., Maerz, W.,  
763 Martin, N.G., Laakso, M., Lakka, T.A., Lehtimäki, T., Lettre, G., Levinson, D.F., Lind, L.,  
764 Lokki, M.-L., Mäntyselkä, P., Melbye, M., Metspalu, A., Mitchell, B.D., Moll, F.L.,  
765 Murray, J.C., Musk, A.W., Nieminen, M.S., Njølstad, I., Ohlsson, C., Oldehinkel, A.J.,  
766 Oostra, B.A., Palmer, L.J., Pankow, J.S., Pasterkamp, G., Pedersen, N.L., Pedersen, O.,  
767 Penninx, B.W., Perola, M., Peters, A., Polašek, O., Pramstaller, P.P., Psaty, B.M., Qi,

768 L., Quertermous, T., Raitakari, O.T., Rankinen, T., Rauramaa, R., Ridker, P.M., Rioux,  
769 J.D., Rivadeneira, F., Rotter, J.I., Rudan, I., Ruijter, H.M. den, Saltevo, J., Sattar, N.,  
770 Schunkert, H., Schwarz, P.E.H., Shuldiner, A.R., Sinisalo, J., Snieder, H., Sørensen,  
771 T.I.A., Spector, T.D., Staessen, J.A., Stefania, B., Thorsteinsdottir, U., Stumvoll, M.,  
772 Tardif, J.-C., Tremoli, E., Tuomilehto, J., Uitterlinden, A.G., Uusitupa, M., Verbeek,  
773 A.L.M., Vermeulen, S.H., Viikari, J.S., Vitart, V., Völzke, H., Vollenweider, P., Waeber,  
774 G., Walker, M., Wallaschofski, H., Wareham, N.J., Watkins, H., Zeggini, E.,  
775 Consortium, C., Consortium, D., Consortium, G., Consortium, G.-Bpg., Consortium, I.,  
776 Consortium, M., Chakravarti, A., Clegg, D.J., Cupples, L.A., Gordon-Larsen, P., Jaquish,  
777 C.E., Rao, D.C., Abecasis, G.R., Assimes, T.L., Barroso, I., Berndt, S.I., Boehnke, M.,  
778 Deloukas, P., Fox, C.S., Groop, L.C., Hunter, D.J., Ingelsson, E., Kaplan, R.C., McCarthy,  
779 M.I., Mohlke, K.L., O'Connell, J.R., Schlessinger, D., Strachan, D.P., Stefansson, K.,  
780 Duijn, C.M. van, Hirschhorn, J.N., Lindgren, C.M., Heid, I.M., North, K.E., Borecki, I.B.,  
781 Kutalik, Z., Loos, R.J.F., 2015. The Influence of Age and Sex on Genetic Associations  
782 with Adult Body Size and Shape: A Large-Scale Genome-Wide Interaction Study.  
783 PLOS Genet. 11, e1005378. <https://doi.org/10.1371/journal.pgen.1005378>  
784 Wise, A.L., Gyi, L., Manolio, T.A., 2013. eXclusion: Toward Integrating the X Chromosome in  
785 Genome-wide Association Analyses. Am. J. Hum. Genet. 92, 643–647.  
786 <https://doi.org/10.1016/j.ajhg.2013.03.017>  
787 Wong, S.Y.S., Lau, E.M.C., Li, M., Chung, T., Sham, A., Woo, J., 2005. The prevalence of Apo  
788 E4 genotype and its relationship to bone mineral density in Hong Kong Chinese. J.  
789 Bone Miner. Metab. 23, 261–265. <https://doi.org/10.1007/s00774-004-0593-0>  
790 Wu, K., Chen, C., Moyzis, R.K., Greenberger, E., Yu, Z., 2016. Gender Interacts with Opioid  
791 Receptor Polymorphism A118G and Serotonin Receptor Polymorphism -1438 A/G on  
792 Speed-Dating Success. Hum. Nat. Hawthorne N 27, 244–260.  
793 <https://doi.org/10.1007/s12110-016-9257-8>  
794 Youssef, S.S., Abd El Aal, A.M., Nasr, A.S., el Zanaty, T., Seif, S.M., 2013. Interleukin-12B gene  
795 polymorphism frequencies in Egyptians and sex-related susceptibility to hepatitis C  
796 infection. J. Interferon Cytokine Res. Off. J. Int. Soc. Interferon Cytokine Res. 33, 415–  
797 419. <https://doi.org/10.1089/jir.2012.0161>  
798  
799

**Table 1. Genetic loci in humans showing sexually antagonistic effects on trait expression.** EAF, effect allele frequency (\* indicates allele frequency derived from 100 genomes database); M, male; F, female. Background colours denote instances where genes and/or variants appear more than once in the list.

| Trait                                                        | Gene    | Locus      | EAF   | M Effect | M Effect SE | F Effect | F Effect SE | Reference                |
|--------------------------------------------------------------|---------|------------|-------|----------|-------------|----------|-------------|--------------------------|
| <b>Complex traits</b>                                        |         |            |       |          |             |          |             |                          |
| Concentration performance score                              | FADS1/2 | rs1535     | 0.672 | 0.2275   | 0.1065      | -0.2394  | 0.1116      | (Lauritzen et al., 2017) |
| Reading speed, number of sentences                           | FADS1/2 | rs174448   | 0.642 | 0.5511   | 0.1069      | -0.6074  | 0.1129      | (Lauritzen et al., 2017) |
| Reading speed, number of sentences                           | ELOVL5  | rs2397142  | 0.695 | -0.1963  | 0.1042      | 0.2364   | 0.1095      | (Lauritzen et al., 2017) |
| Reading speed, correct sentences                             | FADS1/2 | rs174448   | 0.642 | 0.6599   | 0.1077      | -0.3451  | 0.1112      | (Lauritzen et al., 2017) |
| Speed-dating success                                         | OPRM1   | rs1799971  | 0.922 | 0.4697   | 0.2275      | -0.53    | 0.2856      | (Wu et al., 2016)        |
| Speed-dating success                                         | HTR2A   | rs6311     | 0.418 | -0.4826  | 0.1982      | 0.4702   | 0.1964      | (Wu et al., 2016)        |
| Waist-hip-ratio (BMI adjusted)                               | SIM1    | rs17185536 | 0.76  | -0.0166  | 0.008       | 0.0264   | 0.0067      | (Winkler et al., 2015)   |
| Waist-hip-ratio (BMI adjusted)                               | NMU     | rs3805389  | 0.28  | -0.0139  | 0.0067      | 0.0261   | 0.006       | (Winkler et al., 2015)   |
| Waist-hip-ratio (BMI adjusted)                               | GNPNAT1 | rs4898764  | 0.53  | 0.0208   | 0.0066      | -0.0165  | 0.0059      | (Winkler et al., 2015)   |
| Waist-hip-ratio (BMI adjusted)                               | SCGZ    | rs17470444 | 0.71  | 0.0345   | 0.0081      | -0.0149  | 0.0068      | (Winkler et al., 2015)   |
| Waist-hip-ratio (BMI adjusted)                               | IQGAP2  | rs2069664  | 0.53  | 0.0244   | 0.0078      | -0.0183  | 0.0067      | (Winkler et al., 2015)   |
| Waist-hip-ratio (BMI adjusted)                               | SLC2A3  | rs741361   | 0.6   | 0.0272   | 0.0079      | -0.0196  | 0.0067      | (Winkler et al., 2015)   |
| Waist-hip-ratio (BMI adjusted)                               | IRS1    | rs2673140  | 0.38  | 0.022    | 0.0066      | -0.0209  | 0.0059      | (Winkler et al., 2015)   |
| Waist-hip-ratio (BMI adjusted)                               | TTN     | rs2042995  | 0.23  | 0.0198   | 0.0066      | -0.022   | 0.0078      | (Winkler et al., 2015)   |
| Waist-hip-ratio (BMI adjusted)                               | RXRA    | rs10881574 | 0.07  | 0.0268   | 0.008       | -0.0191  | 0.0067      | (Winkler et al., 2015)   |
| Waist-hip-ratio (BMI adjusted)                               | PTPRD   | rs7042428  | 0.98  | 0.0244   | 0.0071      | -0.0166  | 0.0063      | (Winkler et al., 2015)   |
| Waist-hip-ratio (BMI adjusted)                               | CERC2   | rs17809093 | 0.04  | 0.0294   | 0.0091      | -0.024   | 0.0077      | (Winkler et al., 2015)   |
| Reaction time (RT) in the Stroop task, congruent condition   | CHRNA5  | rs3841324  | 0.406 | -1.5421  | 0.3857      | 0.9945   | 0.2517      | (Schneider et al., 2015) |
| Reaction time (RT) in the Stroop task, incongruent condition | CHRNA5  | rs3841324  | 0.406 | -1.6215  | 0.389       | 1.0215   | 0.2521      | (Schneider et al., 2015) |
| Reaction time (RT) in the Negative priming task              | CHRNA5  | rs3841324  | 0.406 | -1.675   | 0.3912      | 0.6299   | 0.247       | (Schneider et al., 2015) |



|                                                  |                 |                |        |         |        |         |        |                            |
|--------------------------------------------------|-----------------|----------------|--------|---------|--------|---------|--------|----------------------------|
| Borderline personality traits after maltreatment | OXTR            | rs53576        | 0.738  | -0.3429 | 0.0881 | 0.2066  | 0.0857 | (Cicchetti et al., 2014)   |
| Borderline personality traits after maltreatment | FKPB5           | CATT haplotype | -      | 0.2041  | 0.0877 | -0.195  | 0.0857 | (Cicchetti et al., 2014)   |
| fluid intelligence                               | C16orf62 (OXTR) | rs226849       | 0.46   | -0.3949 | 0.1869 | 0.494   | 0.1814 | (Kiy et al., 2013)         |
| face perception                                  | C16orf62 (OXTR) | rs226849       | 0.46   | -0.5819 | 0.1909 | 0.3498  | 0.1788 | (Kiy et al., 2013)         |
| face memory                                      | C16orf62 (OXTR) | rs226849       | 0.46   | -0.3679 | 0.1864 | 0.3562  | 0.1789 | (Kiy et al., 2013)         |
| Hippocampal volume                               | SLC6A4          | rs25531        | 0.39   | -       |        | -       |        | (Price et al., 2013)       |
| Sociopathy (in alcoholics)                       | SLC6A4          | rs25531        | 0.51   | -       |        | -       |        | (Herman et al., 2011)      |
| systolic blood pressure S_NIGHT                  | PON1            | rs3917542      | -      | -0.1047 | 0.0637 | 0.1129  | 0.0645 | (Padmanabhan et al., 2010) |
| systolic blood pressure S_NIGHT                  | PON3            | rs17884563     | -      | -0.1482 | 0.0637 | 0.1061  | 0.0645 | (Padmanabhan et al., 2010) |
| systolic blood pressure S_CLIN                   | EDNRB           | rs1335803      | -      | -0.1308 | 0.0637 | 0.1129  | 0.0645 | (Padmanabhan et al., 2010) |
| diastolic blood pressure D_NIGHT                 | DRD1            | rs265974       | -      | -0.1482 | 0.0637 | 0.1502  | 0.0646 | (Padmanabhan et al., 2010) |
| diastolic blood pressure D_HOME                  | SLC4A2          | rs2303933      | -      | -0.1482 | 0.0637 | 0.1325  | 0.0646 | (Padmanabhan et al., 2010) |
| diastolic blood pressure D_CLIN                  | LPL             | rs17410577     | -      | -0.1047 | 0.0637 | 0.1775  | 0.0647 | (Padmanabhan et al., 2010) |
| Psychological Stress                             | BDNF            | rs6265         | 0.149  | -       |        | -       |        | (Shalev et al., 2009)      |
| BMI standard deviation score (children)          | FAS             | rs2228305      | 0.0312 | -0.552  | 0.2259 | 0.4427  | 0.2075 | (Korner et al., 2007)      |
| Pain sensitivity                                 | OPRM1           | rs1799971      | 0.8817 | -       |        | -       |        | (Fillingim et al., 2005)   |
| Central DBP                                      | REN             | rs6693954      | 0.22   | -0.4444 | 0.2132 | 1.1052  | 0.3923 | (Ljungberg et al., 2014)   |
| <b><u>Disease risk/severity</u></b>              |                 |                |        |         |        |         |        |                            |
| Graves ophthalmopathy in GD                      | PRR3            | rs2074503      | 0.3586 | 0.4397  | 0.1682 | -0.2185 | 0.0851 | (Liu et al., 2014)         |
| Colorectal cancer                                | LTA             | rs1041981      | 0.32   | -0.0722 | 0.0368 | 0.1027  | 0.0453 | (Sainz et al., 2012)       |
| Arterial blood pressure                          | PPAR            | rs1801282      | 0.1213 | -       |        | -       |        | (Franck et al., 2012)      |
| Schizophrenia risk                               | RELN            | rs7341475      | 0.851* | 1.2396  | 0.2819 | -0.762  | 0.3662 | (Ovadia and Shifman, 2011) |
| Colon cancer survival                            | ESR2            | (CA)n repeats  | -      | 0.2272  | 0.0962 | -0.2046 | 0.1205 | (Press et al., 2011)       |
| Schizophrenia risk                               | DAO             | rs2070586      | 0.2729 | 0.1982  | 0.0888 | -0.2537 | 0.0908 | (Kim et al., 2010)         |

|                                                |                  |                          |          |         |        |         |        |                               |
|------------------------------------------------|------------------|--------------------------|----------|---------|--------|---------|--------|-------------------------------|
| T2DM, fasting glucose                          | SCARB1           | rs9919713                | 0.04     | 0.1865  | 0.0853 | -0.2515 | 0.0697 | (McCarthy et al., 2009)       |
| Depression                                     | SLC6A4           | rs25531                  | 0.4586   | 0.5404  | 0.2277 | -0.3996 | 0.1859 | (Sjoberg et al., 2006)        |
| Infertility in cystic fibrosis                 | CFTR             | rs213950                 | 0.417931 | -       |        | -       |        | (Morea et al., 2005)          |
| Bone mineral density                           | APOE             | rs429358                 | 0.0798   | -       |        | -       |        | (Wong et al., 2005)           |
| Narcolepsy severity                            | COMT             | Long allele              | 0.4588   | 1.3596  | 0.3878 | -2.2152 | 0.4871 | (Dauvilliers et al., 2001)    |
| Nonsyndromic cleft lip                         | IMPX             | rs11142081               | 0.863    | 1.2156  | 0.0937 | -1.1161 | 0.0783 | (Carlson et al., 2018)        |
| Nonsyndromic cleft lip                         | IMPX             | rs72804706               | 0.898    | -0.816  | 0.0906 | 2.0665  | 0.0908 | (Carlson et al., 2018)        |
| Nonsyndromic cleft lip                         | IMPX             | rs77590619               | 0.744    | -0.8577 | 0.0904 | 1.2291  | 0.0804 | (Carlson et al., 2018)        |
| Allergy                                        | ACP1             | A* allele (CG haplotype) | -        | -       |        | -       |        | (Gloria-Bottini et al., 2007) |
| Hepatitis C susceptibility                     | IL-12B           | rs3212227                | 0.3463   | -       |        | -       |        | (Youssef et al., 2013)        |
| RSV severity                                   | IL-9             | rs2069885                | 0.15     | 0.1888  | 0.0933 | -0.2794 | 0.0957 | (Schuurhof et al., 2010)      |
| CV risk marker (plasma fatty acid composition) | FABP2            | rs1799883                | 0.287    | -       |        | -       |        | (Gastaldi et al., 2007)       |
| Bone mineral density                           | NR3C1            | GCAG haplotype           | -        | 0.6854  | 0.3676 | -0.9029 | 0.4311 | (Peng et al., 2008)           |
| Anxiety                                        | NGF              | rs6330                   | 0.451    | 0.4562  | 0.18   | -0.4674 | 0.1817 | (Lang et al., 2008)           |
| Melanoma risk                                  | RNASEL, miR-146a | AG/AA and C haplotype    | -        | 0.4525  | 0.1564 | -0.3553 | 0.174  | (Sangalli et al., 2017)       |

## Figure legends

Figure 1. Figure 1. PRISMA flow diagram for systematic review of sexually antagonistic loci in humans.

Figure 2. The relationship between effect allele frequency and effect size ratio. Point size varies according to the variance of effect size ratio - larger points have smaller variance and therefore a larger weighting in the model. The vertical dotted line represents the switch point between a net-negative effect of a particular locus (effect size ratio  $>-1$ ) and a net positive effect (effect size ratio  $<-1$ ). The blue line represents the predicted values derived from the generalized linear model fitted to the data (see Results).

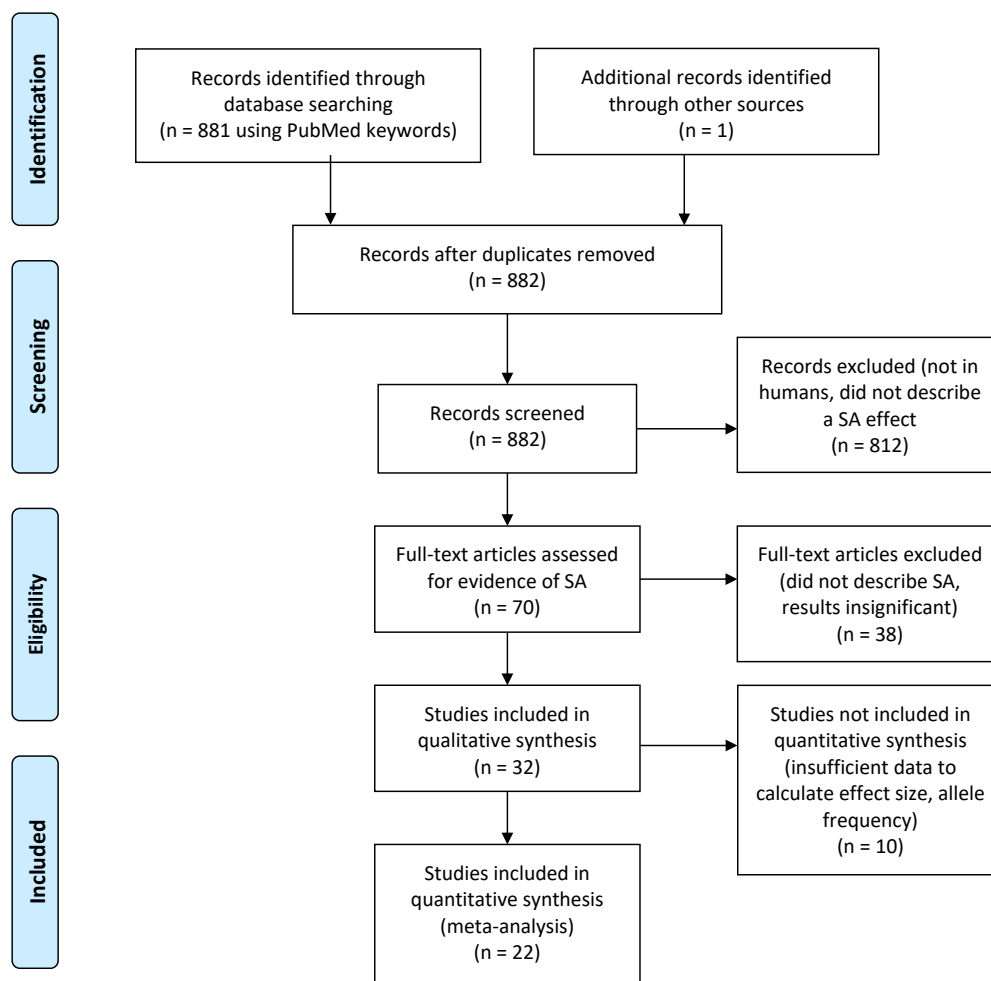

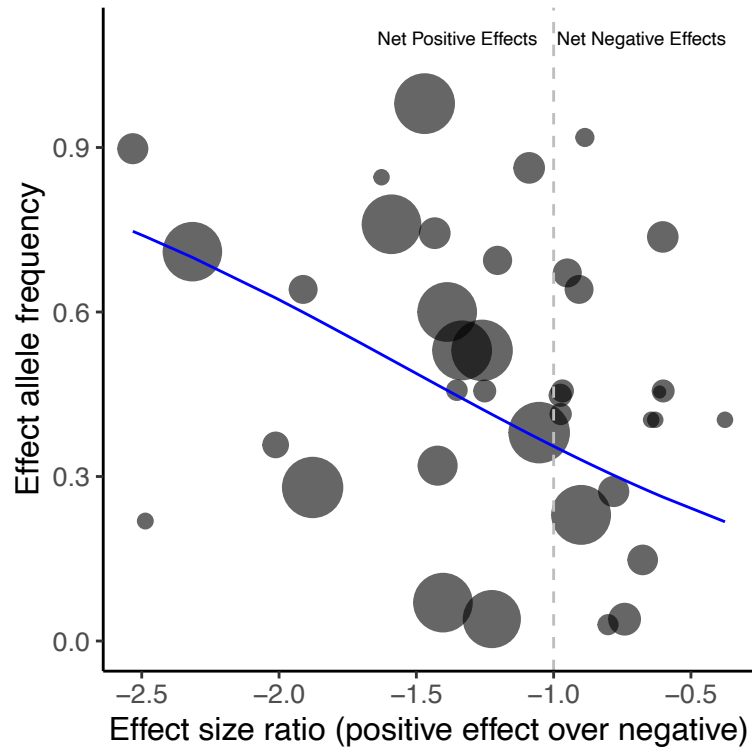

Source: https://medrxiv.org/content/10.1101/2020.12.16.20248300v1.full.pdf
